# Supplementary material for: Chloramphenicol Mitigates Oxidative Stress by Inhibiting Translation of Mitochondrial Complex I in Dopaminergic Neurons of Toxin-Induced Parkinson's Disease Model
Source: Oxid Med Cell Longev. 2019 Aug 26;2019:4174803. doi: 10.1155/2019/4174803 (PMC6732590; doi:10.1155/2019/4174803)
Supplement: Supplementary Materials — This article contains supplementary information, which is available to authorized users. [file 4174803.f1.docx]

***Oxidative Medicine and Cellular Longevity***

**Supplementary Information**

**Chloramphenicol mitigates oxidative stress by inhibiting translation of mitochondrial complex I in dopaminergic neurons of toxin-induced Parkinson's disease model**

Jeongsu Han1, 3, 6, Soo Jeong Kim1, 3, 6, Min Jeong Ryu1,Yunseon Jang1, 2, 3,Min Joung Lee1, 2, 3, Xianshu Ju1, 2, 3,Yu Lim Lee1, 2, 3, Jianchen Cui1, 2, 3,Minho Shong4, 5, Jun Young Heo1, 2, 3,* and Gi Ryang Kweon1, 2*

1Department of Biochemistry, 2Department of Medical science, 3Infection Control Convergence Research Center, 4Research Center for Endocrine and Metabolic Diseases, Chungnam National University Hospital, 5Department of Internal Medicine, Chungnam National University School of Medicine, Daejeon 35015, Republic of Korea 6Co-first author. *To whom correspondence should be addressed.


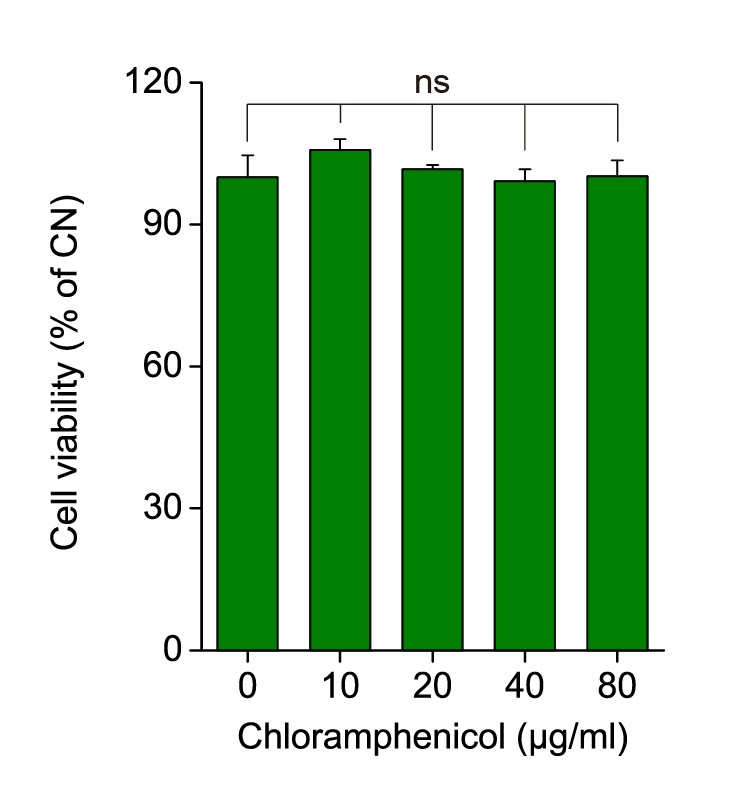


**Figure S1: SN4741 cells were treated with 10 to 80 μg/ml CP for 48 h. And the survival rate of dopaminergic neurons was confirmed using CCK8 assay (n = 15)**. Data are representative of three independent experiments. One-way ANOVA followed by the post hoc Tukey’s test. ns, not significant. Error bars represent + SD.


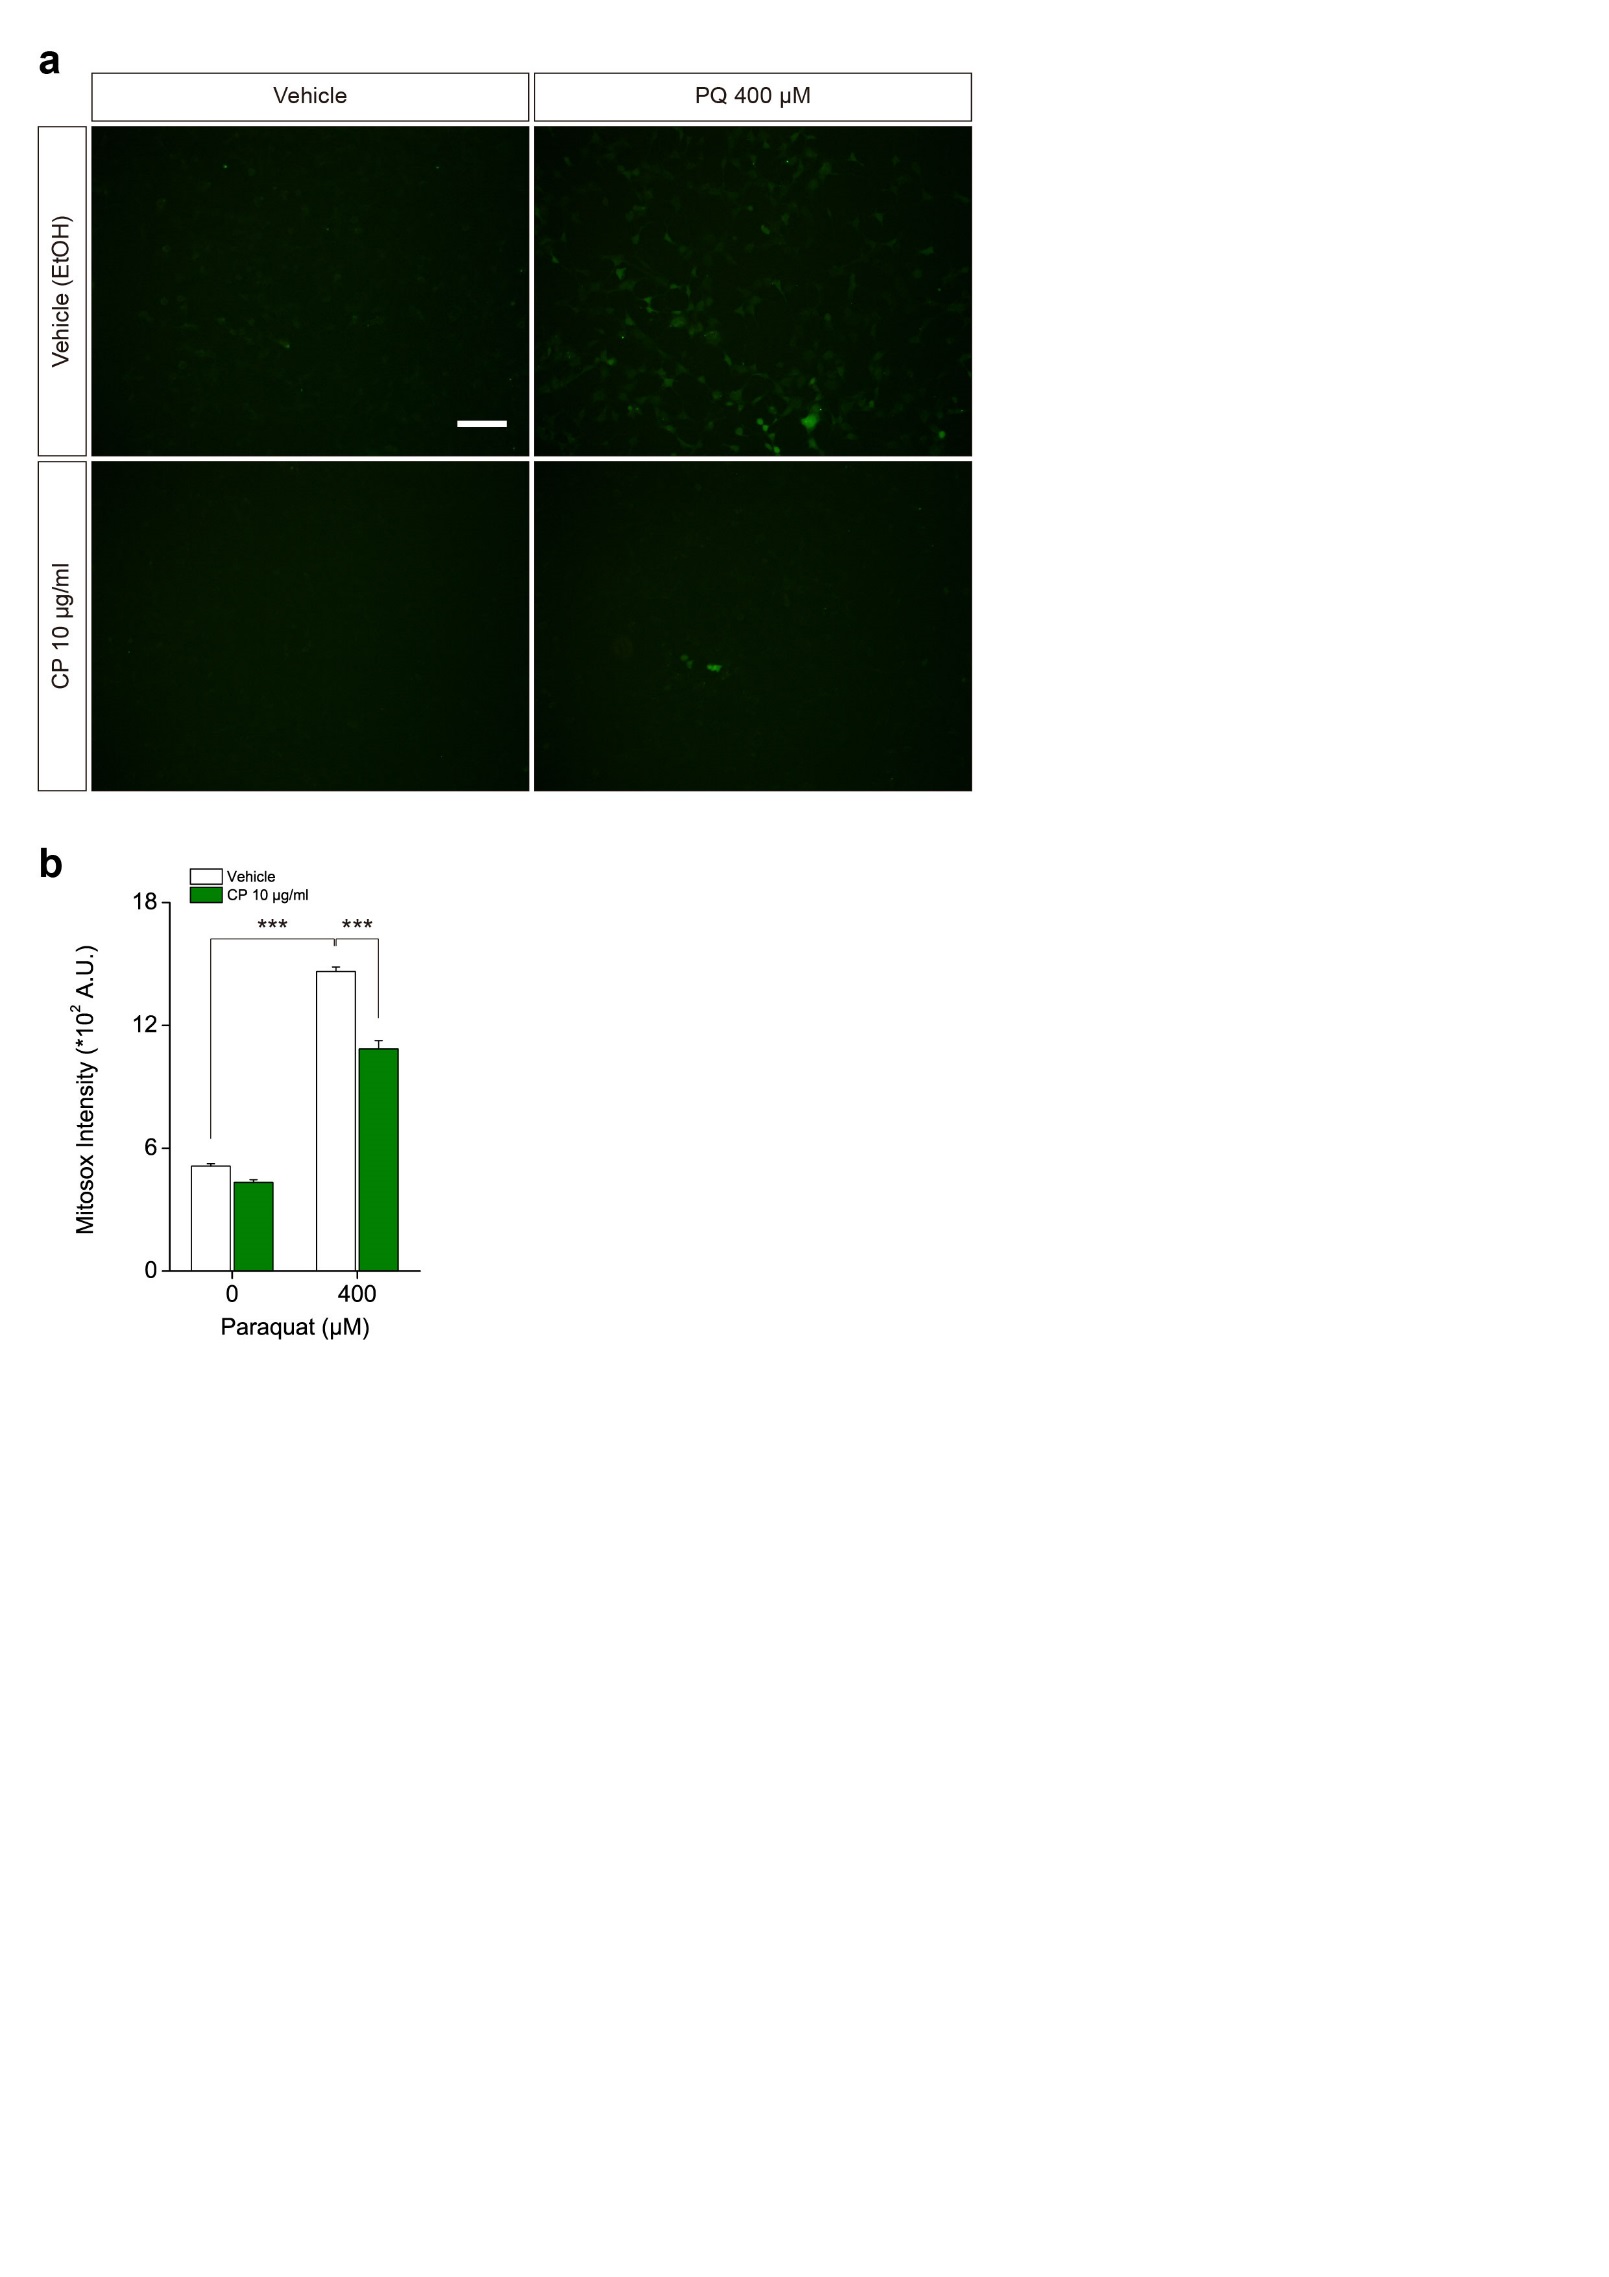


**Figure S2: SN4147 cells were treated with 10 μg/ml CP and PQ, and ROS was measured by staining with the fluorescent dye DCF-DA and Mitosox.** (a) The amount of total ROS production (DCF-DA, green) was visually confirmed by fluorescence microscopy. Scale bars, 100 μm. (b) The total amount of fluorescently stained mitochondrial superoxide was quantified by FACS analysis (n = 15). All data are representative of three independent experiments. ***, P < 0.001 by by one-way ANOVA in (b). Error bars represent + SD.


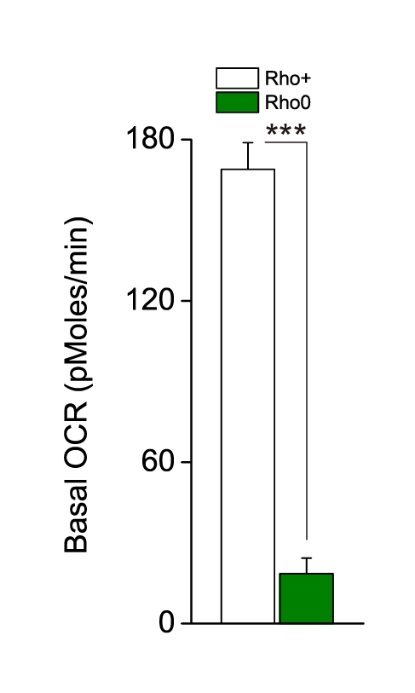


**Figure S3: Oxygen consumption rate (OCR), a direct indicator of mitochondrial function, was measured using an XF24 analyzer in Rho-positive (Rho+) and Rho-negative (Rho0) cells.** Bar graph showing basal OCR (n = 15). Data are representative of three independent experiments. ***, P < 0.001 by two-tailed unpaired t test. Error bars represent SD.

**Table 1: Lists the top 100 most effective drugs protected against the PQ-induced cell death in the MN9D dopaminergic neuronal cell line**

| **Molecular Name** | **Linear Formula** | **M.W.** | **Survival**  **Rate (%)** |
| --- | --- | --- | --- |
| CHLORAMPHENICOL | C11H12Cl2N2O5 | 323.1 | 96.8 |
| DICHLOROPHENE | C13H10Cl2O2 | 269.1 | 96.6 |
| THIAMPHENICOL | C12H15Cl2NO5S | 356.2 | 94.2 |
| TETRACYCLINE HYDROCHLORIDE | C22H25ClN2O8 | 480.9 | 91.4 |
| MONENSIN SODIUM | C37H63NaO10 | 690.9 | 91.3 |
| CHLORAMPHENICOL HEMISUCCINATE | C15H16Cl2N2O8 | 423.2 | 88.8 |
| AMODIAQUINE DIHYDROCHLORIDE | C20H24Cl3N3O | 428.8 | 87.0 |
| CIPROFLOXACIN | C17H18FN3O3 | 331.3 | 85.1 |
| ENOXACIN | C15H17FN4O3 | 320.3 | 83.6 |
| HYDROCORTISONE HEMISUCCINATE | C25H34O8 | 462.5 | 83.5 |
| CEPHALOTHIN SODIUM | C16H15N2NaO6S2 | 418.4 | 83.0 |
| OFLOXACIN | C18H20FN3O4 | 361.4 | 83.0 |
| QUININE SULFATE | C20H26N2O6S | 422.5 | 82.0 |
| OLEANDOMYCIN PHOSPHATE | C35H64NO16P | 785.9 | 81.2 |
| CHLORTETRACYCLINE | C22H23ClN2O8 | 478.9 | 80.5 |
| DEMECLOCYCLINE HYDROCHLORIDE | C21H22Cl2N2O8 | 501.3 | 80.4 |
| MINOCYCLINE HYDROCHLORIDE | C23H28ClN3O7 | 493.9 | 76.6 |
| OXYTETRACYCLINE | C22H25ClN2O9 | 496.9 | 76.4 |
| USNIC ACID | C18H16O7 | 344.3 | 76.3 |
| FURAZOLIDONE | C8H7N3O5 | 225.2 | 75.3 |
| TAMOXIFEN CITRATE | C32H37NO8 | 563.7 | 74.4 |
| HYDROCORTISONE ACETATE | C23H32O6 | 404.5 | 73.7 |
| CARBENICILLIN DISODIUM | C17H16N2Na2O6S | 422.4 | 73.6 |
| PYRAZINAMIDE | C5H5N3O | 123.1 | 73.5 |
| CLINDAMYCIN HYDROCHLORIDE | C18H34Cl2N2O5S | 461.5 | 73.5 |
| HYDROCORTISONE SODIUM PHOSPHATE | C21H29Na2O8P | 486.4 | 73.5 |
| NITROMIDE | C7H5N3O5 | 211.1 | 73.3 |
| BACITRACIN | C66H103N17O16S | 1422.7 | 72.3 |
| 1S,9R-beta-HYDRASTINE | C20H21NO4 | 339.4 | 72.2 |
| CHLOROQUINE DIPHOSPHATE | C18H32ClN3O8P2 | 515.9 | 72.0 |
| CEFOTAXIME SODIUM | C16H16N5NaO7S2 | 477.5 | 71.8 |
| PENICILLIN V POTASSIUM | C16H17KN2O5S | 388.5 | 71.8 |
| CANNABIDIOL | C21H30O2 | 314.5 | 71.7 |
| HYDROCORTISONE | C21H30O5 | 362.5 | 71.6 |
| ACETOHYDROXAMIC ACID | C2H5NO2 | 75.1 | 71.3 |
| CHLOROXYLENOL | C8H9ClO | 156.6 | 71.3 |
| CAMPHOR | C10H16O | 152.2 | 71.0 |
| CEPHAPIRIN SODIUM | C17H16N3NaO6S2 | 445.5 | 71.0 |
| STREPTOMYCIN SULFATE | C21H41N7O16S | 679.7 | 70.4 |
| CINCHONIDINE | C19H22N2O | 294.4 | 70.0 |
| ERYTHROMYCIN ETHYLSUCCINATE | C43H75NO16 | 862.1 | 70.0 |
| NITROFURAZONE | C6H6N4O4 | 198.1 | 70.0 |
| CLOFOCTOL | C21H26Cl2O | 365.3 | 69.6 |
| NITROFURANTOIN | C8H6N4O5 | 238.2 | 69.4 |
| ERYTHROMYCIN STEARATE | C55H103NO15 | 1018.4 | 69.4 |
| PHTHALYLSULFATHIAZOLE | C17H13N3O5S2 | 403.4 | 69.1 |
| QUININE ETHYL CARBONATE | C23H28N2O4 | 396.5 | 68.9 |
| HYDROCORTISONE BUTYRATE | C25H36O6 | 432.6 | 68.8 |
| FLUMEQUINE | C14H12FNO3 | 261.3 | 68.3 |
| SULFANITRAN | C14H13N3O5S | 335.3 | 68.2 |
| SISOMICIN SULFATE | C19H39N5O11S | 545.6 | 68.0 |
| SULFADIAZINE | C10H10N4O2S | 250.3 | 67.6 |
| CEPHRADINE SODIUM | C16H19N3O4S | 349.4 | 67.6 |
| FUSIDIC ACID | C31H48O6 | 516.7 | 67.5 |
| VULPINIC ACID | C19H14O5 | 322.3 | 67.4 |
| NEOMYCIN SULFATE | C23H48N6O17S | 712.7 | 67.2 |
| AMPICILLIN SODIUM | C16H18N3NaO4S | 371.4 | 67.0 |
| SULFAMETER | C11H12N4O3S | 280.3 | 67.0 |
| ARECOLINE HYDROBROMIDE | C8H14BrNO2 | 236.1 | 67.0 |
| ACTINOSPECTACIN | C14H26Cl2N2O7 | 405.3 | 66.8 |
| COLISTIMETHATE SODIUM | C57H103N16Na5O28S5 | 1735.8 | 66.8 |
| RIFAMPIN | C43H58N4O12 | 823.0 | 66.6 |
| METAMPICILLIN SODIUM | C17H18N3NaO4S | 383.4 | 66.5 |
| POLYMYXIN B SULFATE | C56H100N16O17S | 1301.6 | 66.5 |
| MOXALACTAM DISODIUM | C20H18N6Na2O9S | 564.4 | 65.9 |
| CEFOPERAZOLE SODIUM | C25H26N9NaO8S2 | 667.7 | 65.8 |
| SUCCINYLSULFATHIAZOLE | C13H13N3O5S2 | 355.4 | 65.5 |
| BENZALKONIUM CHLORIDE | C22H40ClN | 354.0 | 65.1 |
| HYDROXYCHLOROQUINE | C18H26ClN3O | 335.9 | 64.8 |
| CEFMETAZOLE SODIUM | C15H16N7NaO5S3 | 493.5 | 64.7 |
| TRIMETHOPRIM | C14H18N4O3 | 290.3 | 64.7 |
| SULFAPYRIDINE | C11H11N3O2S | 249.3 | 64.3 |
| CLOXACILLIN SODIUM | C19H17ClN3NaO5S | 457.9 | 64.0 |
| PIROMIDIC ACID | C14H16N4O3 | 288.3 | 64.0 |
| ARTEMISININ | C15H22O5 | 282.3 | 63.8 |
| ISONIAZID | C6H7N3O | 137.1 | 63.7 |
| NORFLOXACIN | C16H18FN3O3 | 319.3 | 63.6 |
| METHICILLIN SODIUM | C17H19N2NaO6S | 402.4 | 63.1 |
| SULFAMONOMETHOXINE | C11H12N4O3S | 280.3 | 63.1 |
| CEFOXITIN SODIUM | C16H16N3NaO7S2 | 449.4 | 63.1 |
| CLOXYQUIN | C9H6ClNO | 179.6 | 62.9 |
| DICLOXACILLIN SODIUM | C19H16Cl2N3NaO5S | 492.3 | 62.7 |
| SULFACHLORPYRIDAZINE | C10H9ClN4O2S | 284.7 | 62.4 |
| OXACILLIN SODIUM | C19H18N3NaO5S | 423.4 | 62.2 |
| GENTAMICIN SULFATE | C21H45N5O11S | 575.7 | 61.9 |
| CEFAMANDOLE SODIUM | C18H17N6NaO5S2 | 484.5 | 61.8 |
| CEFSULODIN SODIUM | C22H19N4NaO8S2 | 554.5 | 61.7 |
| DAPSONE | C12H12N2O2S | 248.3 | 61.7 |
| MAFENIDE HYDROCHLORIDE | C7H11ClN2O2S | 222.7 | 61.4 |
| SULFANILAMIDE | C6H8N2O2S | 172.2 | 61.3 |
| ETHIONAMIDE | C8H10N2S | 166.2 | 61.3 |
| CINCHONINE | C19H22N2O | 294.4 | 61.3 |
| BERBERINE CHLORIDE | C20H18ClNO4 | 371.8 | 61.3 |
| DIETHYLCARBAMAZINE CITRATE | C16H29N3O8 | 391.4 | 61.2 |
| SULFISOXAZOLE | C11H13N3O3S | 267.3 | 61.2 |
| SULFABENZAMIDE | C13H12N2O3S | 276.3 | 60.8 |
| ETHAMBUTOL DIHYDROCHLORIDE | C10H26Cl2N2O2 | 277.2 | 60.5 |
| NALIDIXIC ACID | C12H12N2O3 | 232.2 | 60.5 |
| MORANTEL CITRATE | C18H24N2O7S | 412.5 | 59.8 |
| NAFCILLIN SODIUM | C21H21N2NaO5S | 436.5 | 59.6 |

**Table 2: primer sequence for qPCR**

| **Name** |  | | **Sequence (5’→ 3’)** |
| --- | --- | --- | --- |
| *ND1*  (Complex I) | F | GGATCCGAGCATCTTATCCA | |
| R | GGTGGTACTCCCGCTGTAAA | |
| *NDUFA9*  (Complex I) | F | ACTGTGTTTGGGGCTACAGG | |
| R | GATTGATGACCACGTTGCTG | |
| *SDHA*  (Complex II) | F | ACACAGACCTGGTGGAGACC | |
| R | GCACAGTCAGCCTCATTCAA | |
| *CytB*  (Complex III) | F | TGAGGGGGCTTCTCAGTAGA | |
| R | TAGGGCCGCGATAATAAATG | |
| *COX1*  (Complex IV) | F | GGTCAACCAGGTGCACTTTT | |
| R | TGGGGCTCCGATTATTAGTG | |
| *ATP8*  (Complex V) | F | GGCACCTTCACCAAAATCAC | |
| R | GGGGTAATGAATGAGGCAAA | |
| *18S rRNA*  (Endogenous Control) | F | TCATAAGCTTGCGTTGATTA | |
| R | TAGTCAAGTTCGACCGTCTT | |
